# Supplementary material
Source: Springer Nature journal article supplement (https://www.springermedizin.de/resource/supplementary/12911_2012_685_MOESM7_ESM.pdf/9526396)

contributions ←→ event compositions, persistent compositions & EHR Access

time

Contribution  
(event)

03746276-e84b...

Contact  
2012-01-13

...5f4::example.org::1

Problem  
list

...a67::example.org::11

Care plan

...f74::example.org::14

Contribution  
(import)

05acdd13-605f...

Test result  
2012-01-18

...e83::lab.example.com::1

Contribution  
(event)

089ee9e8-7aa8...

Contact  
2012-01-29

...93c::example.org::1

Care plan

...f74::example.org::15

EHR access

...1ff::example.org::5

Contribution  
(correction)

08f73519-8c9c...

Contact  
2012-01-13

...5f4::example.org::2

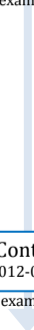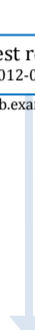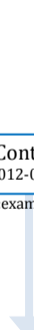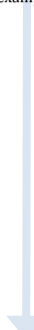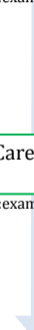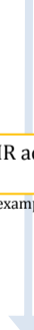

Supplement: MOESM7 [file 9526396]
